# Supplementary material for: Linear and circular PVT1 in hematological malignancies and immune response: two faces of the same coin
Source: Springer Nature journal article supplement (doi:10.1186/s12943-020-01187-5), 2020-03-30
Supplement: MOESM1 [file 17844894]

**Additional Table 1. Core of *PVT1* coexpressed genes in adult and pediatric AML, pediatric ALL and DLBCL.**

| Gene     | Cytoband | Spearman's Correlation |               |               |          |
|----------|----------|------------------------|---------------|---------------|----------|
|          |          | adult AML              | pediatric AML | pediatric ALL | DLBCL    |
| MRPL37   | 1p32.3   | 0.317766               | 0.591173      | 0.406757      | 0.442358 |
| CZIB     | 1p32.3   | 0.272893               | 0.546377      | 0.335849      | 0.389492 |
| ERI3     | 1p34.1   | 0.222042               | 0.56693       | 0.401829      | 0.42716  |
| MRPS15   | 1p34.3   | 0.238564               | 0.471542      | 0.301705      | 0.450065 |
| AK2      | 1p35.1   | 0.457827               | 0.482082      | 0.315006      | 0.403278 |
| ATP5IF1  | 1p35.3   | 0.260609               | 0.471805      | 0.400475      | 0.531806 |
| MECR     | 1p35.3   | 0.215919               | 0.657444      | 0.40537       | 0.466131 |
| ZNF593   | 1p36.11  | 0.347414               | 0.510013      | 0.327784      | 0.538102 |
| MICOS10  | 1p36.13  | 0.375167               | 0.422925      | 0.296592      | 0.431394 |
| AGMAT    | 1p36.21  | 0.308132               | 0.555863      | 0.264567      | 0.439861 |
| PARK7    | 1p36.23  | 0.267451               | 0.522925      | 0.342812      | 0.439535 |
| ATAD3A   | 1p36.33  | 0.26482                | 0.559816      | 0.395073      | 0.385258 |
| AURKAIP1 | 1p36.33  | 0.231101               | 0.429776      | 0.322663      | 0.480243 |
| MTX1     | 1q22     | 0.269077               | 0.518577      | 0.303818      | 0.457664 |
| CCT3     | 1q22     | 0.225237               | 0.655863      | 0.380558      | 0.432696 |
| MRPL24   | 1q23.1   | 0.272476               | 0.569038      | 0.282425      | 0.415653 |
| JMJD4    | 1q42.13  | 0.240363               | 0.468643      | 0.334245      | 0.455601 |
| ZNF692   | 1q44     | 0.258659               | 0.564427      | 0.312534      | 0.468411 |
| IMMT     | 2p11.2 2 | 0.3797                 | 0.436759      | 0.176539      | 0.396982 |
| MDH1     | 2p15     | 0.23155                | 0.425296      | 0.281269      | 0.44366  |
| COX5B    | 2q11.2   | 0.311606               | 0.4361        | 0.32024       | 0.416413 |
| ATIC     | 2q35     | 0.237309               | 0.546904      | 0.484147      | 0.468085 |
| PPP1R7   | 2q37.3   | 0.306036               | 0.451383      | 0.259907      | 0.408489 |
| DTYMK    | 2q37.3   | 0.284592               | 0.585507      | 0.491746      | 0.396114 |
| ACY1     | 3p21.2   | 0.423385               | 0.622661      | 0.348681      | 0.493595 |
| RRP9     | 3p21.2   | 0.282916               | 0.662055      | 0.400454      | 0.420321 |
| MON1A    | 3p21.31  | 0.300561               | 0.577339      | 0.386968      | 0.386018 |
| APEH     | 3p21.31  | 0.276481               | 0.636627      | 0.367657      | 0.403713 |
| UQCRC1   | 3p21.31  | 0.241924               | 0.579051      | 0.401644      | 0.444746 |
| EEFSEC   | 3q21.3   | 0.240619               | 0.574177      | 0.370492      | 0.441706 |
| PCCB     | 3q22.3   | 0.217193               | 0.539394      | 0.41331       | 0.47145  |
| POLR2H   | 3q27.1   | 0.34882                | 0.624638      | 0.415233      | 0.450174 |
| DANCR    | 4q12     | 0.238172               | 0.65942       | 0.280863      | 0.493378 |
| NDUFA2   | 5q31.3   | 0.232381               | 0.497892      | 0.383392      | 0.468411 |
| NOP16    | 5q35.2   | 0.363699               | 0.460211      | 0.369573      | 0.383739 |
| NHP2     | 5q35.3   | 0.232767               | 0.603689      | 0.376679      | 0.452888 |
| DNPH1    | 6p21.1   | 0.419333               | 0.63531       | 0.359108      | 0.512592 |
| MRPL14   | 6p21.1   | 0.405488               | 0.491831      | 0.247685      | 0.390686 |
| TOMM6    | 6p21.1   | 0.369123               | 0.555204      | 0.261835      | 0.513135 |
| CCDC167  | 6p21.2   | 0.23731                | 0.433992      | 0.3368        | 0.541033 |
| PFDN6    | 6p21.32  | 0.283669               | 0.571673      | 0.264743      | 0.448654 |
| NELFE    | 6p21.33  | 0.233086               | 0.442029      | 0.367316      | 0.440187 |

|          |          |          |          |          |          |
|----------|----------|----------|----------|----------|----------|
| NDUFAF4  | 6q16.1   | 0.26127  | 0.519104 | 0.306196 | 0.49924  |
| HDCC2    | 6q22.31  | 0.354061 | 0.50224  | 0.390796 | 0.404798 |
| PDCD2    | 6q27     | 0.219203 | 0.518972 | 0.355239 | 0.466782 |
| MRPS24   | 7p13     | 0.276854 | 0.494335 | 0.267417 | 0.432805 |
| POP7     | 7q22.1   | 0.323431 | 0.513834 | 0.441095 | 0.464937 |
| AP1S1    | 7q22.1   | 0.286618 | 0.543347 | 0.267053 | 0.431611 |
| MRPS28   | 8q21.13  | 0.347651 | 0.498287 | 0.260107 | 0.427703 |
| NDUFB9   | 8q24.13  | 0.515007 | 0.579183 | 0.306472 | 0.412505 |
| CYC1     | 8q24.3   | 0.376912 | 0.634387 | 0.363011 | 0.398936 |
| TSTA3    | 8q24.3   | 0.372199 | 0.618577 | 0.352909 | 0.485128 |
| SLC39A4  | 8q24.3   | 0.354491 | 0.658366 | 0.400558 | 0.498806 |
| PUF60    | 8q24.3   | 0.340131 | 0.63834  | 0.355156 | 0.471559 |
| SHARPIN  | 8q24.3   | 0.304778 | 0.625823 | 0.38706  | 0.544073 |
| ADCK5    | 8q24.3   | 0.286504 | 0.600659 | 0.327512 | 0.432588 |
| MFSD3    | 8q24.3   | 0.279155 | 0.628458 | 0.351578 | 0.531372 |
| FBXL6    | 8q24.3   | 0.275008 | 0.626898 | 0.334307 | 0.500977 |
| HSF1     | 8q24.3   | 0.239661 | 0.524901 | 0.265902 | 0.508142 |
| HINT2    | 9p13.3   | 0.295364 | 0.560395 | 0.325224 | 0.428789 |
| RPP25L   | 9p13.3   | 0.215593 | 0.526286 | 0.313    | 0.503582 |
| DPM2     | 9q34.11  | 0.335737 | 0.507905 | 0.337644 | 0.422927 |
| SH3GLB2  | 9q34.11  | 0.31055  | 0.498379 | 0.45214  | 0.394051 |
| PHPT1    | 9q34.3   | 0.348545 | 0.596706 | 0.470733 | 0.426726 |
| TPRN     | 9q34.3   | 0.329137 | 0.662579 | 0.372955 | 0.410334 |
| MRPS2    | 9q34.3   | 0.24909  | 0.624506 | 0.331019 | 0.506839 |
| SSNA1    | 9q34.3   | 0.226935 | 0.544186 | 0.384954 | 0.445506 |
| TYSND1   | 10q22.1  | 0.240707 | 0.560606 | 0.278971 | 0.476552 |
| COMTD1   | 10q22.2  | 0.334368 | 0.596838 | 0.255442 | 0.449739 |
| CHCHD1   | 10q22.2  | 0.312582 | 0.427404 | 0.258537 | 0.522471 |
| MRPS16   | 10q22.2  | 0.237139 | 0.552042 | 0.381476 | 0.393074 |
| NDUFB8   | 10q24.31 | 0.380987 | 0.544796 | 0.264484 | 0.469713 |
| NPM3     | 10q24.32 | 0.289049 | 0.561792 | 0.271702 | 0.46244  |
| DPCD     | 10q24.32 | 0.261374 | 0.435178 | 0.242417 | 0.404147 |
| SFXN4    | 10q26.11 | 0.308577 | 0.556258 | 0.430554 | 0.432045 |
| ECHS1    | 10q26.3  | 0.342843 | 0.571278 | 0.371104 | 0.580004 |
| PSMC3    | 11p11.2  | 0.220999 | 0.50975  | 0.387061 | 0.404907 |
| POLR2L   | 11p15.5  | 0.287313 | 0.453623 | 0.326086 | 0.386235 |
| MRPL23   | 11p15.5  | 0.254404 | 0.46917  | 0.31424  | 0.508033 |
| UQCC3    | 11q12.3  | 0.241874 | 0.624506 | 0.380419 | 0.430634 |
| TMEM223  | 11q12.3  | 0.225181 | 0.472596 | 0.237541 | 0.449739 |
| CCDC85B  | 11q13.1  | 0.25155  | 0.565876 | 0.349141 | 0.544616 |
| RNASEH2C | 11q13.1  | 0.240398 | 0.590777 | 0.368887 | 0.414785 |
| MRPL11   | 11q13.2  | 0.253399 | 0.516996 | 0.389967 | 0.45799  |
| MRPL51   | 12p13.31 | 0.236383 | 0.502503 | 0.37615  | 0.429766 |
| TSFM     | 12q14.1  | 0.239746 | 0.422134 | 0.293137 | 0.384064 |
| MRPL52   | 14q11.2  | 0.21705  | 0.424506 | 0.351543 | 0.447026 |
| TRMT61A  | 14q32.33 | 0.237742 | 0.617787 | 0.31124  | 0.40013  |
| WDR61    | 15q25.1  | 0.264889 | 0.586166 | 0.375819 | 0.454624 |
| TUFM     | 16p11.2  | 0.235384 | 0.597233 | 0.332821 | 0.433891 |
| MRPS34   | 16p13.3  | 0.329522 | 0.622661 | 0.317938 | 0.491533 |

|            |          |          |          |          |          |
|------------|----------|----------|----------|----------|----------|
| STUB1      | 16p13.3  | 0.294255 | 0.513966 | 0.320211 | 0.416413 |
| MLST8      | 16p13.3  | 0.268948 | 0.617655 | 0.41155  | 0.482414 |
| METTL26    | 16p13.3  | 0.259275 | 0.645586 | 0.364536 | 0.51498  |
| ECI1       | 16p13.3  | 0.223584 | 0.594335 | 0.400951 | 0.45495  |
| COQ9       | 16q21    | 0.227817 | 0.557708 | 0.33611  | 0.392531 |
| CTU2       | 16q24.3  | 0.341935 | 0.489196 | 0.264111 | 0.420864 |
| TRAPPC2L   | 16q24.3  | 0.300691 | 0.442424 | 0.306922 | 0.403061 |
| APRT       | 16q24.3  | 0.244697 | 0.567589 | 0.325802 | 0.441164 |
| TMEM256    | 17p13.1  | 0.282316 | 0.42108  | 0.322908 | 0.537234 |
| NT5C3B     | 17q21.2  | 0.286883 | 0.422793 | 0.293211 | 0.428029 |
| ATP5MC1    | 17q21.32 | 0.314413 | 0.62253  | 0.373281 | 0.516283 |
| NME1       | 17q21.33 | 0.331226 | 0.680501 | 0.375137 | 0.421515 |
| NME2       | 17q21.33 | 0.275102 | 0.44809  | 0.225281 | 0.481871 |
| MRPL27     | 17q21.33 | 0.253595 | 0.522661 | 0.309031 | 0.452453 |
| FDXR       | 17q25.1  | 0.431999 | 0.741634 | 0.42596  | 0.428137 |
| MRPL58     | 17q25.1  | 0.294011 | 0.573518 | 0.288289 | 0.433673 |
| ATP5PD     | 17q25.1  | 0.243919 | 0.510804 | 0.298635 | 0.433131 |
| MRPL12     | 17q25.3  | 0.357178 | 0.697365 | 0.401763 | 0.521602 |
| NDUFAF8    | 17q25.3  | 0.322701 | 0.622266 | 0.368819 | 0.537017 |
| RFNG       | 17q25.3  | 0.257312 | 0.428854 | 0.23968  | 0.528224 |
| ANAPC11    | 17q25.3  | 0.248098 | 0.451515 | 0.311464 | 0.40469  |
| DUS1L      | 17q25.3  | 0.247842 | 0.523452 | 0.17218  | 0.444963 |
| MRPL34     | 19p13.11 | 0.319502 | 0.45863  | 0.315139 | 0.476878 |
| TMEM161A   | 19p13.11 | 0.311546 | 0.587615 | 0.365224 | 0.420864 |
| LSM4       | 19p13.11 | 0.272074 | 0.431225 | 0.352247 | 0.453322 |
| CCDC124    | 19p13.11 | 0.262654 | 0.618709 | 0.308732 | 0.484151 |
| NDUFB7     | 19p13.12 | 0.271581 | 0.445586 | 0.365997 | 0.421624 |
| GADD45GIP1 | 19p13.13 | 0.237268 | 0.572464 | 0.382539 | 0.484477 |
| YIPF2      | 19p13.2  | 0.290044 | 0.429908 | 0.266905 | 0.447243 |
| ECSIT      | 19p13.2  | 0.286406 | 0.599078 | 0.4352   | 0.416196 |
| MRPL4      | 19p13.2  | 0.270686 | 0.621871 | 0.38647  | 0.459509 |
| QTRT1      | 19p13.2  | 0.244836 | 0.599868 | 0.341378 | 0.544833 |
| MICOS13    | 19p13.3  | 0.326529 | 0.564822 | 0.30813  | 0.467108 |
| PLEKHJ1    | 19p13.3  | 0.293841 | 0.589592 | 0.311987 | 0.512918 |
| MAP2K2     | 19p13.3  | 0.259029 | 0.419895 | 0.34049  | 0.514003 |
| TIMM13     | 19p13.3  | 0.256566 | 0.557839 | 0.292637 | 0.501086 |
| NDUFA11    | 19p13.3  | 0.246217 | 0.486561 | 0.371548 | 0.438233 |
| POLR2E     | 19p13.3  | 0.213902 | 0.536759 | 0.356278 | 0.422058 |
| PDCD2L     | 19q13.11 | 0.309577 | 0.533333 | 0.375644 | 0.394377 |
| MRPS12     | 19q13.2  | 0.334144 | 0.620685 | 0.322507 | 0.461246 |
| ECH1       | 19q13.2  | 0.267257 | 0.527273 | 0.340404 | 0.412288 |
| ERCC2      | 19q13.32 | 0.406259 | 0.595652 | 0.349343 | 0.417933 |
| BCAT2      | 19q13.33 | 0.235998 | 0.559025 | 0.427493 | 0.442358 |
| ISOC2      | 19q13.42 | 0.339631 | 0.529249 | 0.437052 | 0.417173 |
| HSPBP1     | 19q13.42 | 0.232059 | 0.478524 | 0.395321 | 0.439861 |
| ITPA       | 20p13    | 0.323956 | 0.520817 | 0.345036 | 0.465263 |
| MRPS26     | 20p13    | 0.250036 | 0.62029  | 0.341971 | 0.447351 |
| NECAB3     | 20q11.22 | 0.333059 | 0.470487 | 0.178348 | 0.459835 |
| EIF6       | 20q11.22 | 0.27722  | 0.553623 | 0.291983 | 0.416848 |

|           |                   |          |          |          |          |
|-----------|-------------------|----------|----------|----------|----------|
| FAM207A   | 21q22.3           | 0.259964 | 0.605929 | 0.247962 | 0.477421 |
| RRP1      | 21q22.3           | 0.257442 | 0.575362 | 0.216439 | 0.51726  |
| MRPL40    | 22q11.21          | 0.28536  | 0.563505 | 0.34129  | 0.427812 |
| TXNRD2    | 22q11.21          | 0.229122 | 0.424769 | 0.230943 | 0.561876 |
| RANBP1    | 22q11.21          | 0.21003  | 0.562055 | 0.43521  | 0.400564 |
| MIF       | 22q11.23          | 0.230839 | 0.50224  | 0.328572 | 0.539731 |
| TXN2      | 22q12.3           | 0.283637 | 0.595125 | 0.38237  | 0.500326 |
| ZBTB18    | 1q44              | -0.30258 | -0.47918 | -0.23537 | -0.41066 |
| ITPRID2   | 2q31.3            | -0.25407 | -0.44862 | -0.26053 | -0.43888 |
| TMF1      | 3p14.1            | -0.29412 | -0.42069 | -0.3388  | -0.40447 |
| XRN1      | 3q23              | -0.22674 | -0.49407 | -0.2692  | -0.46863 |
| PIK3CA    | 3q26.32           | -0.24712 | -0.5054  | -0.33902 | -0.46591 |
| TLR1      | 4p14              | -0.25292 | -0.52885 | -0.30492 | -0.39231 |
| CNOT6L    | 4q21.1            | -0.42435 | -0.5224  | -0.40224 | -0.44974 |
| DNAJB14   | 4q23              | -0.21048 | -0.43597 | -0.31453 | -0.4505  |
| PJA2      | 5q21.3            | -0.23907 | -0.49051 | -0.35629 | -0.4099  |
| CDC42SE2  | 5q31.1            | -0.275   | -0.53505 | -0.23854 | -0.47264 |
| RC3H2     | 9q33.2            | -0.25405 | -0.44348 | -0.2328  | -0.46635 |
| CCSER2    | 10q23.1           | -0.29253 | -0.53149 | -0.22962 | -0.40339 |
| TNKS2     | 10q23.32          | -0.24349 | -0.47207 | -0.33377 | -0.45289 |
| UBL3      | 13q12.3           | -0.22757 | -0.4776  | -0.3895  | -0.39948 |
| SECISBP2L | 15q21.1           | -0.33806 | -0.46179 | -0.30031 | -0.49577 |
| PIAS1     | 15q23             | -0.24941 | -0.43426 | -0.28275 | -0.46494 |
| IREB2     | 15q25.1           | -0.30425 | -0.47958 | -0.2932  | -0.47188 |
| AKAP13    | 15q25.3           | -0.21147 | -0.43794 | -0.28129 | -0.46743 |
| CYLD      | 16q12.1           | -0.21333 | -0.51673 | -0.42752 | -0.39058 |
| SMURF2    | 17q23.3-<br>q24.1 | -0.27926 | -0.54585 | -0.37692 | -0.5432  |
| PPP1R16B  | 20q11.23          | -0.23771 | -0.56192 | -0.18301 | -0.41251 |
| P2RY10    | Xq21.1            | -0.22269 | -0.5401  | -0.2556  | -0.415   |

---
