# Supplementary material for: Linear and circular PVT1 in hematological malignancies and immune response: two faces of the same coin
Source: Springer Nature journal article supplement (doi:10.1186/s12943-020-01187-5), 2020-03-30
Supplement: MOESM2 [file 17844894]

**Additional Table 2. Pathway enrichment analysis of *PVT1* coexpressed genes.**

| Database                                | Term                                                                | Adjusted P-value | Combined Score | Genes                            |
|-----------------------------------------|---------------------------------------------------------------------|------------------|----------------|----------------------------------|
| <b>Transcription and RNA metabolism</b> |                                                                     |                  |                |                                  |
| GO-BP                                   | transcription from RNA polymerase I promoter                        | 0.038437         | 117.49         | ERCC2;POLR2E;POLR2H;POLR2L       |
| Reactome                                | RNA Pol II CTD phosphorylation and interaction with CE              | 0.005657         | 163.97         | ERCC2;POLR2E;POLR2H;POLR2L       |
| Reactome                                | RNA Pol II CTD phosphorylation and interaction with CE              | 0.0054           | 163.97         | ERCC2;POLR2E;POLR2H;POLR2L       |
| Reactome                                | mRNA Capping                                                        | 0.006898         | 148.00         | ERCC2;POLR2E;POLR2H;POLR2L       |
| Reactome                                | RNA Polymerase I Promoter Escape                                    | 0.007577         | 140.94         | ERCC2;POLR2E;POLR2H;POLR2L       |
| Reactome                                | RNA Polymerase II Pre-transcription Events                          | 0.01045          | 77.01          | ERCC2;POLR2E;POLR2H;NELFE;POLR2L |
| Reactome                                | RNA Polymerase II Transcription Pre-Initiation And Promoter Opening | 0.020017         | 80.07          | ERCC2;POLR2E;POLR2H;POLR2L       |
| Reactome                                | RNA Polymerase II Transcription Initiation And Promoter Clearance   | 0.021043         | 80.07          | ERCC2;POLR2E;POLR2H;POLR2L       |
| Reactome                                | RNA Polymerase II Transcription Initiation                          | 0.020517         | 80.07          | ERCC2;POLR2E;POLR2H;POLR2L       |
| GO-BP                                   | transcription initiation from RNA polymerase I promoter             | 0.037013         | 117.49         | ERCC2;POLR2E;POLR2H;POLR2L       |
| Reactome                                | RNA Polymerase III Transcription Initiation From Type 1 Promoter    | 0.045352         | 79.77          | POLR2E;POLR2H;POLR2L             |
| Reactome                                | RNA Polymerase III Transcription Initiation From Type 2 Promoter    | 0.042203         | 84.12          | POLR2E;POLR2H;POLR2L             |
| Reactome                                | RNA Polymerase III Transcription Initiation From Type 3 Promoter    | 0.044583         | 79.77          | POLR2E;POLR2H;POLR2L             |
| Reactome                                | Formation of the Early Elongation Complex                           | 0.001289         | 207.06         | ERCC2;POLR2E;POLR2H;NELFE;POLR2L |
| Reactome                                | Formation of RNA Pol II elongation complex                          | 0.003037         | 136.09         | ERCC2;POLR2E;POLR2H;NELFE;POLR2L |
| Reactome                                | RNA Polymerase I Chain Elongation                                   | 0.040573         | 53.75          | ERCC2;POLR2E;POLR2H;POLR2L       |
| Reactome                                | RNA Polymerase II Transcription Elongation                          | 0.003216         | 136.09         | ERCC2;POLR2E;POLR2H;NELFE;POLR2L |
| Reactome                                | RNA Polymerase III Chain Elongation                                 | 0.019932         | 149.96         | POLR2E;POLR2H;POLR2L             |
| GO-BP                                   | transcription elongation from RNA polymerase I promoter             | 0.026457         | 148.00         | ERCC2;POLR2E;POLR2H;POLR2L       |

|                    |                                                          |          |         |                                                                                                                                                                                              |
|--------------------|----------------------------------------------------------|----------|---------|----------------------------------------------------------------------------------------------------------------------------------------------------------------------------------------------|
| GO-BP              | transcription elongation from RNA polymerase II promoter | 0.035851 | 63.21   | ERCC2;POLR2E;WDR61;POLR2H;NELFE;POLR2L                                                                                                                                                       |
| Reactome           | RNA Polymerase I Transcription Termination               | 0.00872  | 128.35  | ERCC2;POLR2E;POLR2H;POLR2L                                                                                                                                                                   |
| Reactome           | RNA Polymerase III Transcription Termination             | 0.030568 | 106.02  | POLR2E;POLR2H;POLR2L                                                                                                                                                                         |
| Reactome           | Elongation arrest and recovery                           | 0.007848 | 128.35  | POLR2E;POLR2H;NELFE;POLR2L                                                                                                                                                                   |
| Reactome           | Deadenylation-dependent mRNA decay                       | 0.028467 | 65.89   | NT5C3B;CNOT6L;XRN1;LSM4                                                                                                                                                                      |
| GO-BP              | 7-methylguanosine mRNA capping                           | 0.038595 | 122.73  | ERCC2;POLR2E;POLR2H;POLR2L                                                                                                                                                                   |
| GO-BP              | 7-methylguanosine RNA capping                            | 0.036986 | 122.73  | ERCC2;POLR2E;POLR2H;POLR2L                                                                                                                                                                   |
| Reactome           | Formation of TC-NER Pre-Incision Complex                 | 0.033355 | 60.21   | ERCC2;POLR2E;POLR2H;POLR2L                                                                                                                                                                   |
| Reactome           | Gap-filling DNA repair synthesis and ligation in TC-NER  | 0.049074 | 47.06   | ERCC2;POLR2E;POLR2H;POLR2L                                                                                                                                                                   |
| Reactome           | Formation of TC-NER Pre-Incision Complex                 | 0.033355 | 60.21   | ERCC2;POLR2E;POLR2H;POLR2L                                                                                                                                                                   |
| Reactome           | Gap-filling DNA repair synthesis and ligation in TC-NER  | 0.049074 | 47.06   | ERCC2;POLR2E;POLR2H;POLR2L                                                                                                                                                                   |
| <b>Translation</b> |                                                          |          |         |                                                                                                                                                                                              |
| KEGG               | Ribosome                                                 | 2.48E-06 | 170.97  | MRPL4;MRPS15;MRPS16;MRPS12;MRPL27;MRPS2;MRPL14;MRPL12;MRPL23;MRPL34;MRPL24;MRPL11                                                                                                            |
| GO-BP              | translation                                              | 9.93E-12 | 322.08  | EEFSEC;TSFM;MRPS15;MRPS16;MRPS24;MRPS12;MRPS34;MRPL27;MRPS2;MRPL37;APEH;MRPL23;MRPL34;MRPL24;TUFM;MRPL11;MRPL4;MRPL52;MRPL51;NHP2                                                            |
| GO-BP              | translational elongation                                 | 2.92E-29 | 2191.06 | MRPS15;MRPS16;MRPS12;MRPS34;MRPL14;MRPL58;MRPL37;MRPL12;MRPL34;MRPL11;MRPL4;MRPL40;CHCHD1;EEFSEC;MRPS28;GADD45GIP1;TSFM;MRPS26;MRPS24;MRPL27;MRPS2;MRPL23;MRPL24;TUFM;MRPL52;MRPL51;AURKAIP1 |
| GO-BP              | translational termination                                | 2.48E-27 | 2062.28 | MRPS15;MRPS16;MRPS12;MRPS34;MRPL14;MRPL58;MRPL37;APEH;MRPL12;MRPL34;MRPL11;MRPL4;MRPL40;CHCHD1;MRPS28;GADD45GIP1;MRPS26;MRPS24;MRPL27;MRPS2;MRPL23;MRPL24;MRPL52;MRPL51;AURKAIP1             |
| Reactome           | Mitochondrial translation                                | 9.13E-27 | 2077.14 | MRPS28;GADD45GIP1;TSFM;MRPS15;MRPS26;MRPS16;MRPS24;MRPS12;MRPS34;MRPL27;MRPL14;MRPL37;MRPL34;MRPL12;MRPL23;MRPL24;TUFM;MRPL11;MRPL4;MRPL52;MRPL40;MRPL51;AURKAIP1;CHCHD1                     |
| GO-BP              | mitochondrial translation                                | 1.54E-27 | 1947.82 | MRPS15;MRPS16;MRPS12;MRPS34;MRPL14;MRPL58;MRPL37;MRPL12;MRPL34;MRPL11;MRPL4;MRPL40;CHCHD1;MRPS28;GADD45GIP1;TSFM;MRPS26;MRPS24;MRPL27;M                                                      |

|          |                                         |          |         |                                                                                                                                                                                       |
|----------|-----------------------------------------|----------|---------|---------------------------------------------------------------------------------------------------------------------------------------------------------------------------------------|
|          |                                         |          |         | RPS2;MRPL23;MRPL24;TUFM;MRPL52;MRPL51;AURKAIP1                                                                                                                                        |
| Reactome | Mitochondrial translation initiation    | 2.40E-24 | 1856.90 | MRPS28;GADD45GIP1;MRPS15;MRPS26;MRPS16;MRPS24;MRPS12;MRPS34;MRPL27;MRPL14;MRPL37;MRPL34;MRPL12;MRPL23;MRPL24;MRPL11;MRPL4;MRPL52;MRPL40;MRPL51;AURKAIP1;CHCHD1                        |
| Reactome | Mitochondrial translation elongation    | 2.78E-27 | 2288.40 | MRPS28;GADD45GIP1;TSFM;MRPS15;MRPS26;MRPS16;MRPS24;MRPS12;MRPS34;MRPL27;MRPL14;MRPL37;MRPL34;MRPL12;MRPL23;MRPL24;TUFM;MRPL11;MRPL4;MRPL52;MRPL40;MRPL51;AURKAIP1;CHCHD1              |
| GO-BP    | mitochondrial translational elongation  | 1.12E-29 | 2598.47 | MRPS15;MRPS16;MRPS12;MRPS34;MRPL14;MRPL58;MRPL37;MRPL34;MRPL12;MRPL11;MRPL4;MRPL40;CHCHD1;MRPS28;GADD45GIP1;TSFM;MRPS26;MRPS24;MRPL27;MRPS2;MRPL23;MRPL24;TUFM;MRPL52;MRPL51;AURKAIP1 |
| Reactome | Mitochondrial translation termination   | 1.80E-24 | 1856.90 | MRPS28;GADD45GIP1;MRPS15;MRPS26;MRPS16;MRPS24;MRPS12;MRPS34;MRPL27;MRPL14;MRPL37;MRPL34;MRPL12;MRPL23;MRPL24;MRPL11;MRPL4;MRPL52;MRPL40;MRPL51;AURKAIP1;CHCHD1                        |
| GO-BP    | mitochondrial translational termination | 1.22E-26 | 2077.14 | MRPS28;GADD45GIP1;MRPS15;MRPS26;MRPS16;MRPS24;MRPS12;MRPS34;MRPL27;MRPS2;MRPL14;MRPL58;MRPL37;MRPL34;MRPL12;MRPL23;MRPL24;MRPL11;MRPL4;MRPL52;MRPL40;MRPL51;AURKAIP1;CHCHD1           |

| <b>Metabolism</b> |                                                        |          |        |                                     |
|-------------------|--------------------------------------------------------|----------|--------|-------------------------------------|
| Reactome          | Metabolism of nucleotides                              | 0.001238 | 108.62 | DTYMK;ATIC;NME2;AK2;ITPA;NME1;APRT  |
| KEGG              | Purine metabolism                                      | 0.004737 | 57.14  | NT5C3B;ATIC;AK2;NME2;ITPA;NME1;APRT |
| Hu Cyc 2016       | superpathway of purine nucleotide salvage              | 0.017779 | 77.39  | AK2;NME2;APRT;NME1                  |
| Hu Cyc 2016       | purine nucleotides de novo biosynthesis                | 0.014816 | 77.39  | ATIC;AK2;NME2;NME1                  |
| KEGG              | Pyrimidine metabolism                                  | 0.049006 | 53.75  | NT5C3B;DTYMK;NME2;NME1              |
| Hu Cyc 2016       | pyrimidine deoxyribonucleotide phosphorylation         | 0.014645 | 294.98 | DTYMK;NME2;NME1                     |
| Hu Cyc 2016       | pyrimidine deoxyribonucleotides biosynthesis from CTP  | 0.01969  | 193.18 | DTYMK;NME2;NME1                     |
| Hu Cyc 2016       | pyrimidine deoxyribonucleotides de novo biosynthesis   | 0.013127 | 193.18 | DTYMK;NME2;NME1                     |
| Hu Cyc 2016       | superpathway of pyrimidine deoxyribonucleoside salvage | 0.012041 | 176.69 | DTYMK;NME2;NME1                     |

|             |                                                                                                                     |          |        |                                                                      |
|-------------|---------------------------------------------------------------------------------------------------------------------|----------|--------|----------------------------------------------------------------------|
| Hu Cyc 2016 | superpathway of pyrimidine deoxyribonucleotides de novo biosynthesis                                                | 0.015836 | 120.69 | DTYMK;NME2;NME1                                                      |
| KEGG        | Oxidative phosphorylation                                                                                           | 1.69E-05 | 134.85 | NDUFB9;NDUFB8;NDUFB7;ATP5PD;NDUFA11;NDUFA2;UQCRC1;CYC1;COX5B;ATP5MC1 |
| Reactome    | The citric acid (TCA) cycle and respiratory electron transport                                                      | 1.37E-04 | 107.28 | NDUFB9;NDUFB8;NDUFB7;NDUFA11;NDUFAF4;NDUFA2;UQCRC1;CYC1;ECSIT;COX5B  |
| Reactome    | Respiratory electron transport                                                                                      | 1.04E-06 | 256.77 | NDUFB9;NDUFB8;NDUFB7;NDUFA11;NDUFAF4;NDUFA2;UQCRC1;CYC1;ECSIT;COX5B  |
| Reactome    | Respiratory electron transport, ATP synthesis by chemiosmotic coupling, and heat production by uncoupling proteins. | 7.21E-06 | 184.85 | NDUFB9;NDUFB8;NDUFB7;NDUFA11;NDUFAF4;NDUFA2;UQCRC1;CYC1;ECSIT;COX5B  |
| Reactome    | Complex I biogenesis                                                                                                | 3.59E-05 | 258.81 | NDUFB9;NDUFB8;NDUFB7;NDUFA11;NDUFAF4;NDUFA2;ECSIT                    |
| GO-BP       | mitochondrial ATP synthesis coupled electron transport                                                              | 2.40E-05 | 205.36 | NDUFB9;NDUFB8;NDUFB7;NDUFA11;UQCC3;NDUFA2;UQCRC1;CYC1;COX5B          |
| GO-BP       | NADH dehydrogenase complex assembly                                                                                 | 3.44E-05 | 235.09 | NDUFB9;NDUFB8;NDUFAF8;NDUFB7;NDUFA11;NDUFAF4;NDUFA2;ECSIT            |
| GO-BP       | mitochondrial respiratory chain complex I biogenesis                                                                | 3.17E-05 | 235.09 | NDUFB9;NDUFB8;NDUFAF8;NDUFB7;NDUFA11;NDUFAF4;NDUFA2;ECSIT            |
| GO-BP       | mitochondrial respiratory chain complex I assembly                                                                  | 2.94E-05 | 235.09 | NDUFB9;NDUFB8;NDUFAF8;NDUFB7;NDUFA11;NDUFAF4;NDUFA2;ECSIT            |
| GO-BP       | respiratory electron transport chain                                                                                | 4.21E-05 | 176.24 | NDUFB9;NDUFB8;NDUFB7;NDUFA11;UQCC3;NDUFA2;UQCRC1;CYC1;COX5B          |
| GO-BP       | mitochondrial respiratory chain complex assembly                                                                    | 5.17E-05 | 167.94 | NDUFB9;NDUFAF8;NDUFB8;NDUFB7;NDUFA11;UQCC3;NDUFAF4;NDUFA2;ECSIT      |
| GO-BP       | mitochondrial electron transport, NADH to ubiquinone                                                                | 0.013276 | 123.37 | NDUFB9;NDUFB8;NDUFB7;NDUFA11;NDUFA2                                  |
| GO-BP       | mitochondrial electron transport, ubiquinol to cytochrome c                                                         | 0.038012 | 212.41 | UQCC3;UQCRC1;CYC1                                                    |
| Hu Cyc 2016 | isoleucine degradation                                                                                              | 0.049226 | 105.19 | ECHS1;BCAT2                                                          |
| Reactome    | Mitochondrial Fatty Acid Beta-Oxidation                                                                             | 0.017206 | 162.42 | ECHS1;ECI1;PCCB                                                      |
